# Supplementary material
Source: PubMed Central journal article supplement (PMC3179765)
Supplement: NIHMS321326-supplement-1_si_001.pdf [file NIHMS321326-supplement-1_si_001.pdf]

# Actinopolysporins A-C and Tubercidin as a Pcd4 Stabilizer from the Halophilic Actinomycete *Actinopolyspora erythraea* YIM 90600

Li-Xing Zhao,<sup>†,‡</sup> Sheng-Xiong Huang,<sup>§,⊥</sup> Shu-Kun Tang,<sup>†</sup> Cheng-Lin Jiang,<sup>†</sup> Yanwen Duan,<sup>⊥</sup> John A. Beutler,<sup>⊥</sup> Curtis J. Henrich,<sup>⊥,∇</sup> James B. McMahon,<sup>⊥</sup> Tobias Schmid,<sup>○</sup> Johanna S. Bleses,<sup>○</sup> Nancy H. Colburn,<sup>#</sup> Scott R. Rajsiki,<sup>‡</sup> and Ben Shen<sup>\*,‡,§,⊥,∇</sup>

<sup>†</sup>Yunnan Institute of Microbiology, Yunnan University, Kunming, Yunnan 650091, People's Republic of China

<sup>‡</sup>Division of Pharmaceutical Sciences, University of Wisconsin-Madison, Madison, WI 53705, USA  
Departments of <sup>§</sup>Chemistry and <sup>§</sup>Molecular Therapeutics and <sup>&</sup>Natural Products Library Initiative at TSRI, Scripps Florida, Jupiter, FL 33458, USA

<sup>⊥</sup>Hunan Engineering Research Center of Combinatorial Biosynthesis and Natural Product Drug Discovery, Changsha, Hunan 410329, People's Republic of China

<sup>⊥</sup>Molecular Targets Laboratory, <sup>∇</sup>SAIC-Frederick, Inc., and <sup>#</sup>Laboratory of Cancer Prevention, NCI, Frederick, MD 21702, USA

<sup>○</sup>Institute of Biochemistry I/ZAFES, Faculty of Medicine, Goethe-University Frankfurt, 60590 Frankfurt, Germany

\*Author to whom correspondence should be addressed: Tel: (561) 228-2456, Fax: (561) 228-2472, E-mail: [shenb@scripps.edu](mailto:shenb@scripps.edu)

## Supporting Information

|                                                                                                        |    |
|--------------------------------------------------------------------------------------------------------|----|
| <b>Figure S1.</b> <sup>1</sup> H NMR spectrum of actinopolysporin A ( <b>1</b> ) in CDCl <sub>3</sub>  | S2 |
| <b>Figure S2.</b> <sup>13</sup> C NMR spectrum of actinopolysporin A ( <b>1</b> ) in CDCl <sub>3</sub> | S3 |
| <b>Figure S3.</b> <sup>1</sup> H NMR spectrum of actinopolysporin B ( <b>2</b> ) in CDCl <sub>3</sub>  | S4 |
| <b>Figure S4.</b> <sup>13</sup> C NMR spectrum of actinopolysporin B ( <b>2</b> ) in CDCl <sub>3</sub> | S5 |
| <b>Figure S5.</b> <sup>1</sup> H NMR spectrum of actinopolysporin C ( <b>3</b> ) in CDCl <sub>3</sub>  | S6 |
| <b>Figure S6.</b> <sup>13</sup> C NMR spectrum of actinopolysporin C ( <b>3</b> ) in CDCl <sub>3</sub> | S7 |





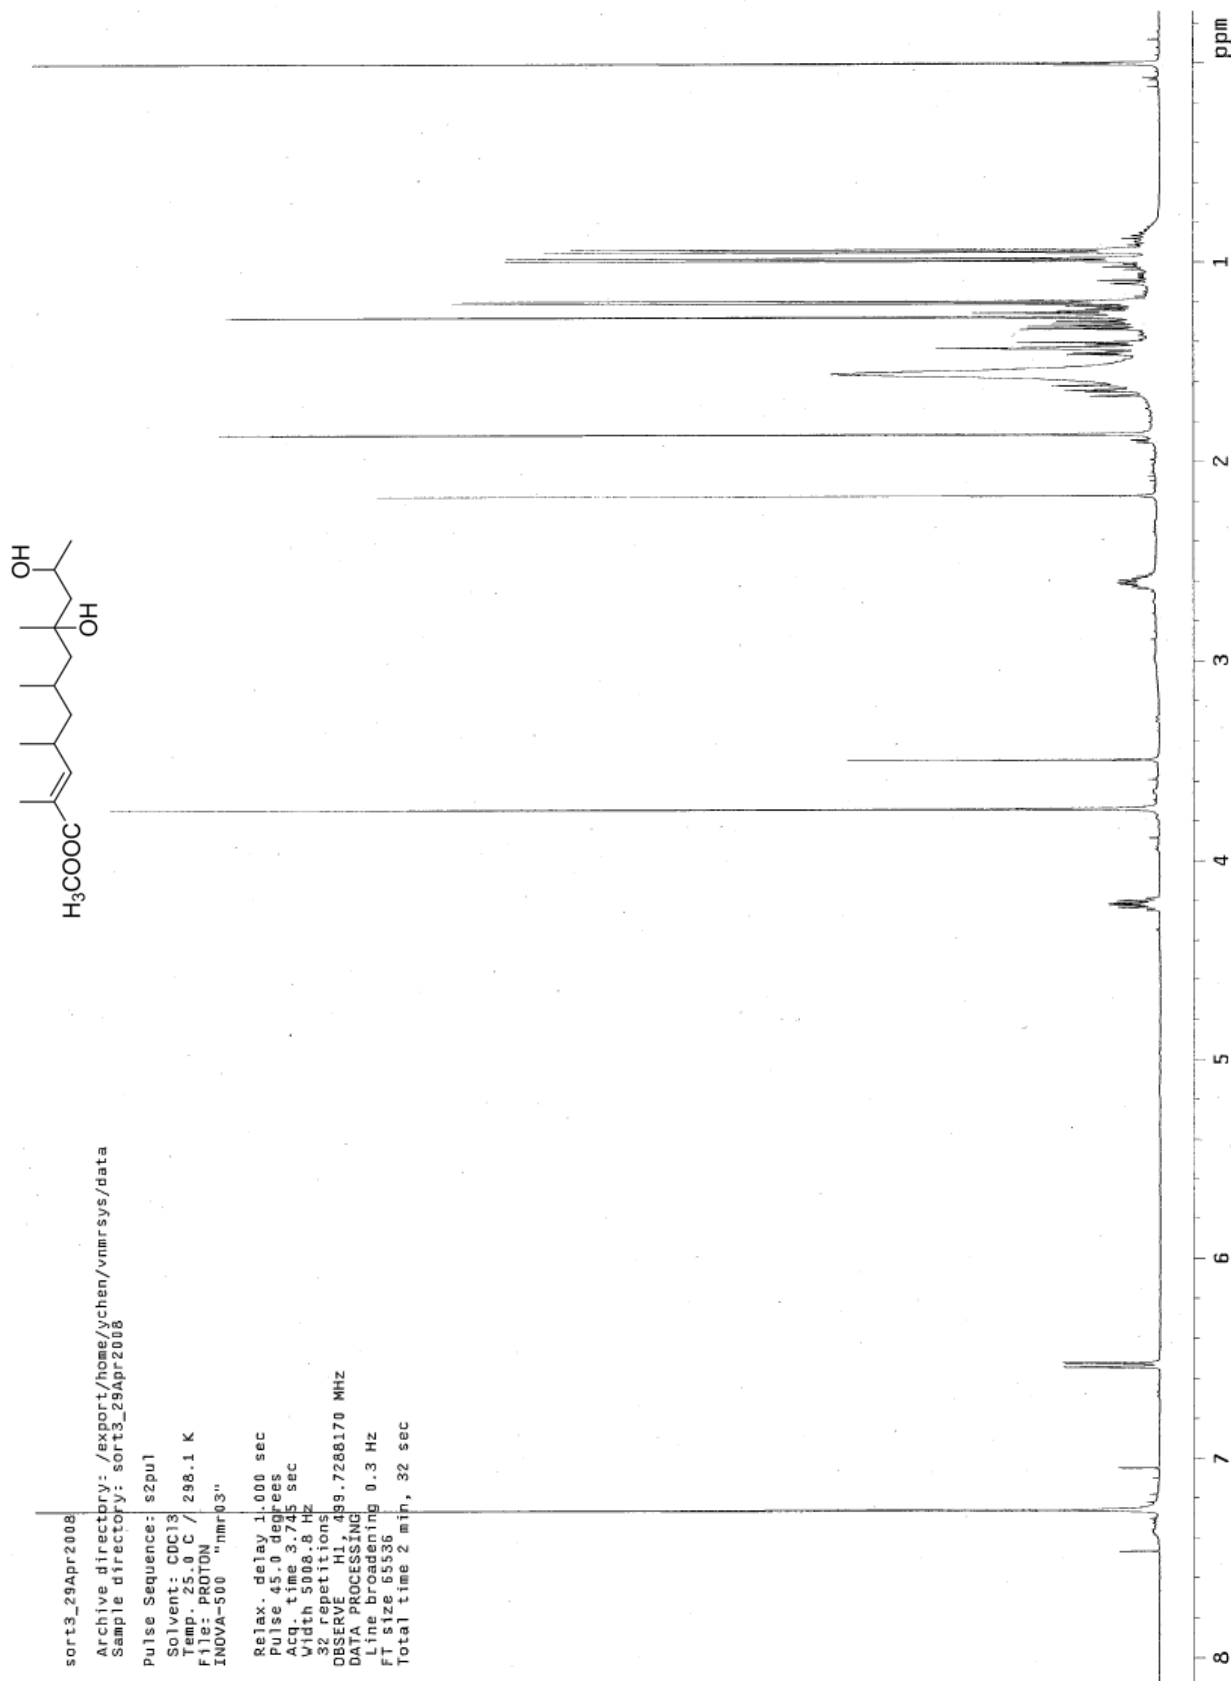

Figure S3. <sup>1</sup>H NMR spectrum of actinopolysporin B (2) in CDCl<sub>3</sub>

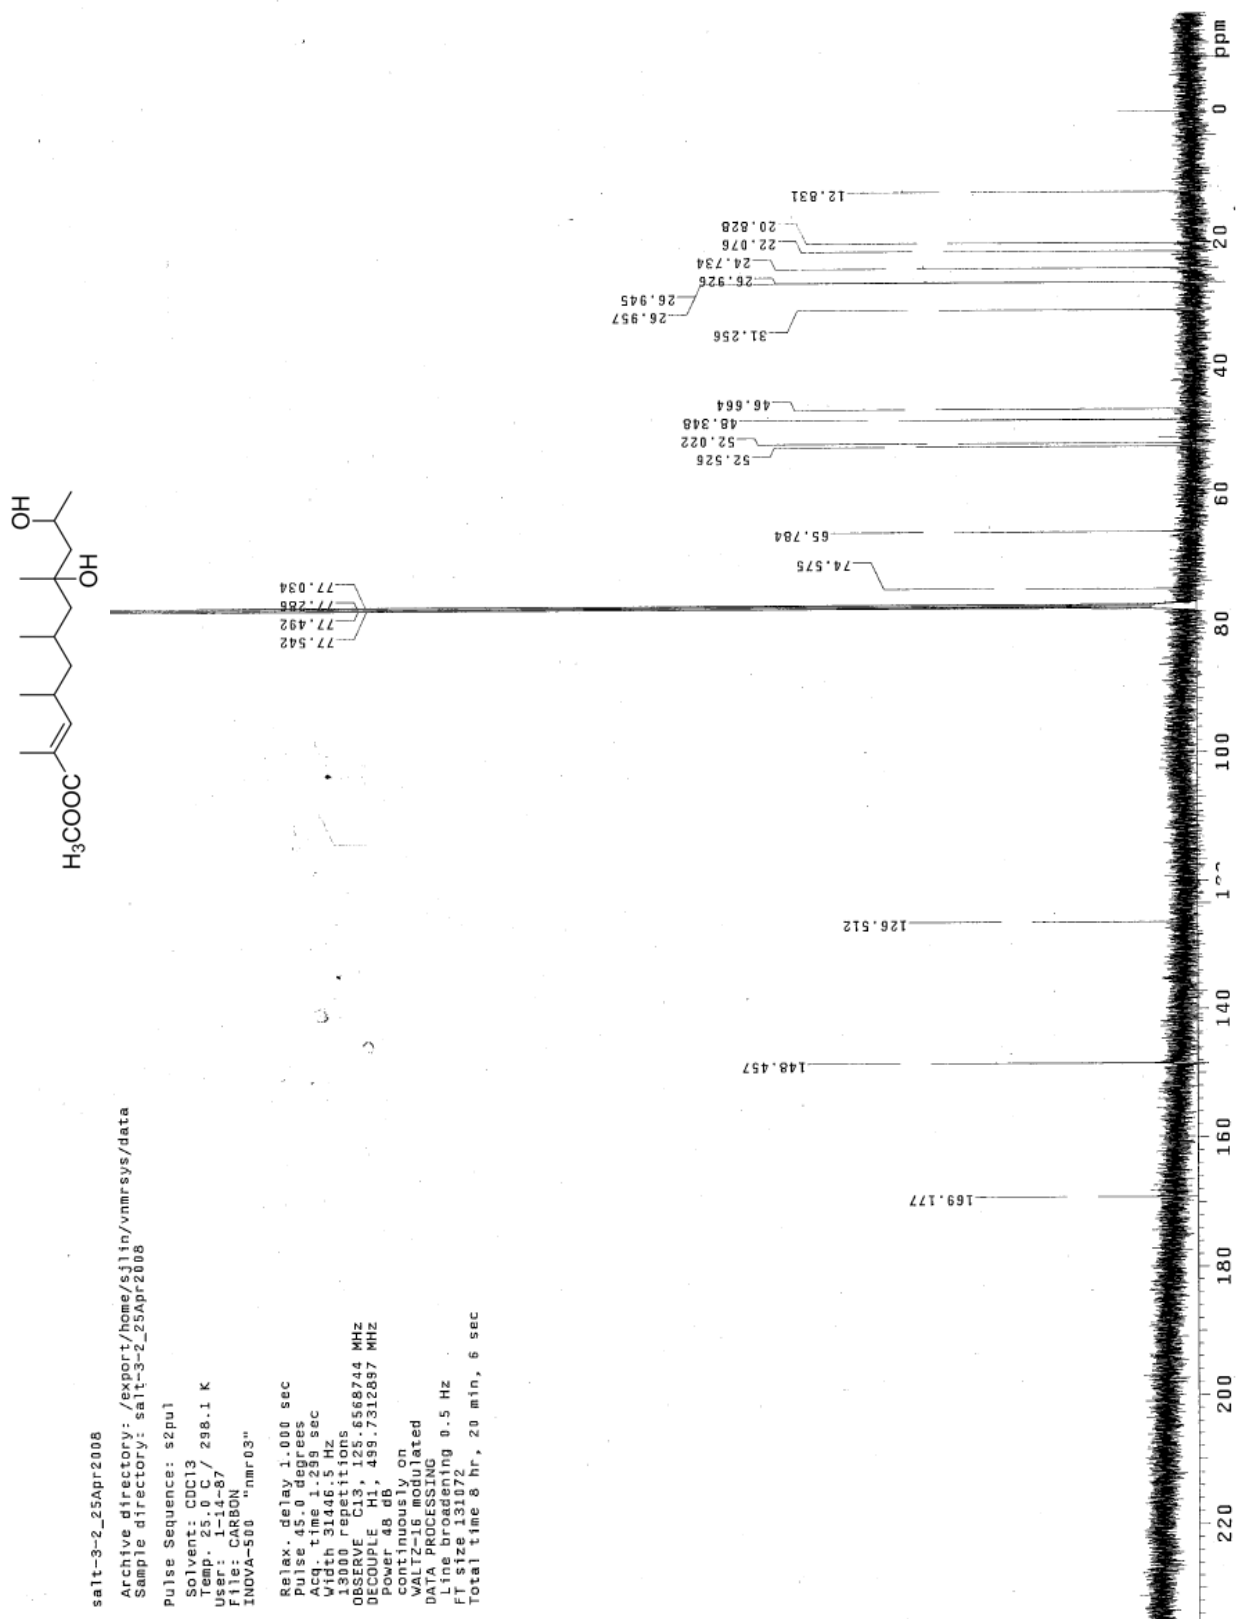

Figure S4.  $^{13}\text{C}$  NMR spectrum of actinopolysporin B (2) in  $\text{CDCl}_3$

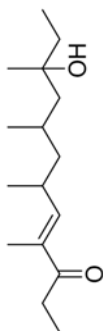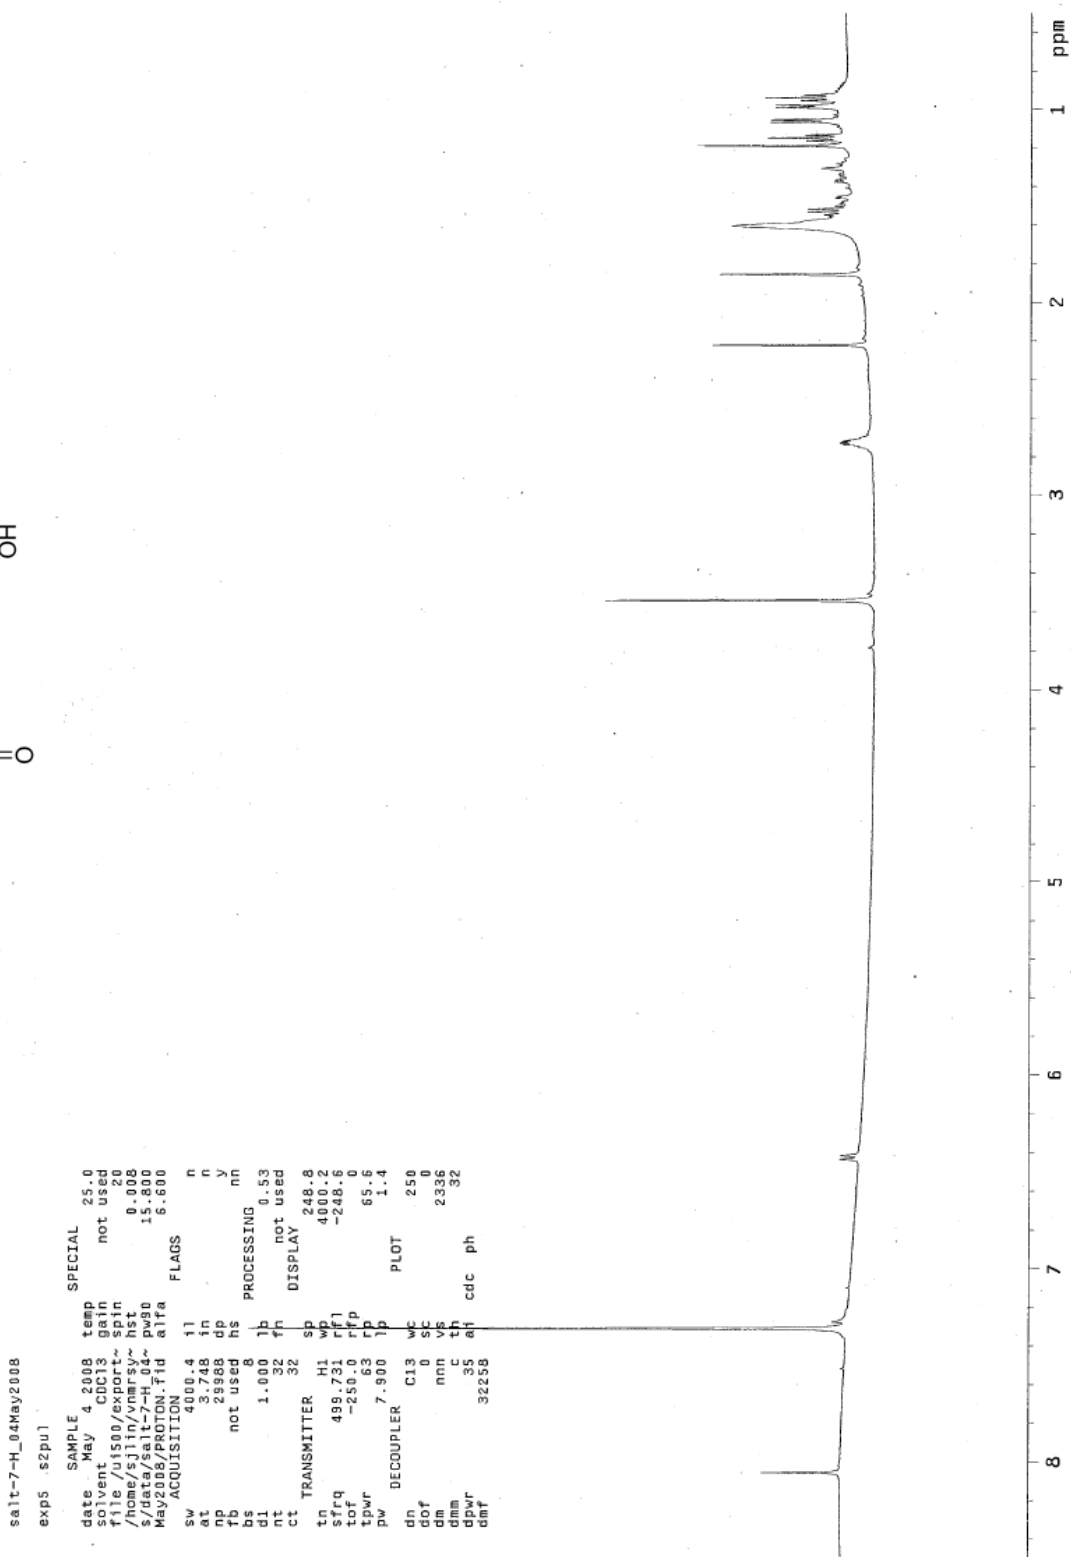

Figure S5.  $^1\text{H}$  NMR spectrum of actinopolysporin C (**3**) in  $\text{CDCl}_3$

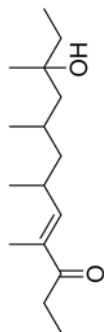

salt-7-13C\_04May2008  
 Archive directory: /export/home/sjlin/vnmrsys/data  
 Sample directory: salt-7-13C\_04May2008  
 Pulse Sequence: s2pu1  
 Solvent: CDCl3  
 Temp: 25.0 C / 298.1 K  
 User: 1-14-87  
 File: CARBON  
 INOVA-500 "nmr03"  
 Relax. delay 1.000 sec  
 Pulse 45.0 degrees  
 Acq. time 1.000 sec  
 Width 26402.6 Hz  
 18500 repetitions  
 OBSERVE C13, 125.9568744 MHz  
 DECOUPLE H1, 499.7312697 MHz  
 Powering on  
 WALTZ-16 modulated  
 DATA PROCESSING  
 Line broadening 0.5 Hz  
 FT size 65536  
 Total time 9 hr, 12 min, 30 sec

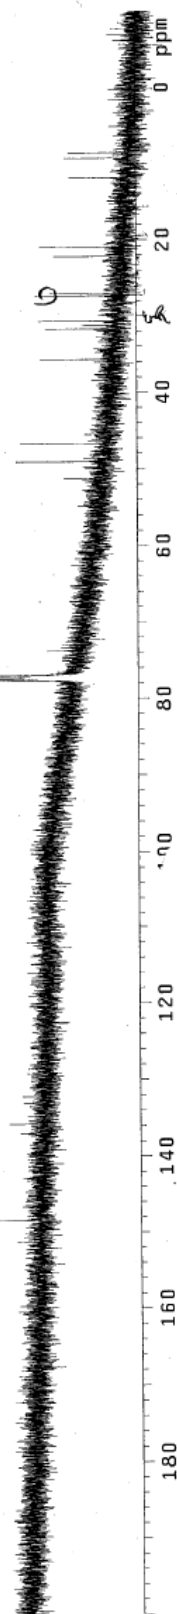

Figure S6.  $^{13}\text{C}$  NMR spectrum of actinopolysporin C (3) in  $\text{CDCl}_3$
